# Supplementary material for: Facile and large-scale fabrication of hierarchical ZnFe2O4/graphene hybrid films as advanced binder-free anodes for lithium-ion batteries
Source: Royal Society of Chemistry journal article supplement (doi:10.1039/c4nj01802h), 2014-11-27
Supplement: c4nj01802h1.pdf [file c4nj01802h1.pdf]

Electronic Supplementary Material (ESI) for New Journal of Chemistry.

This journal is © The Royal Society of Chemistry 2014

## Supporting Information

### Facile and large-scale fabrication of hierarchical ZnFe<sub>2</sub>O<sub>4</sub>/graphene hybrid films as advanced binder-free anodes for lithium-ion batteries

Bo Wang, Songmei Li,\* Bin Li, Jianhua Liu, and Mei Yu

Key Laboratory of Aerospace Advanced Materials and Performance of Ministry of  
Education, School of Materials Science and Engineering, Beihang University, Beijing,  
100191, P. R. China

\* Corresponding author. Tel: +86 10 82317103; fax: +86 10 82317103.

E-mail address: songmei\_li@buaa.edu.cn.

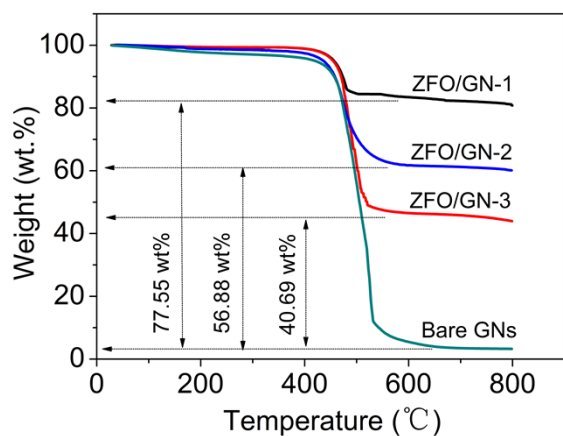

**Fig. S1** TGA curves of the ZFO/GN hybrid films.

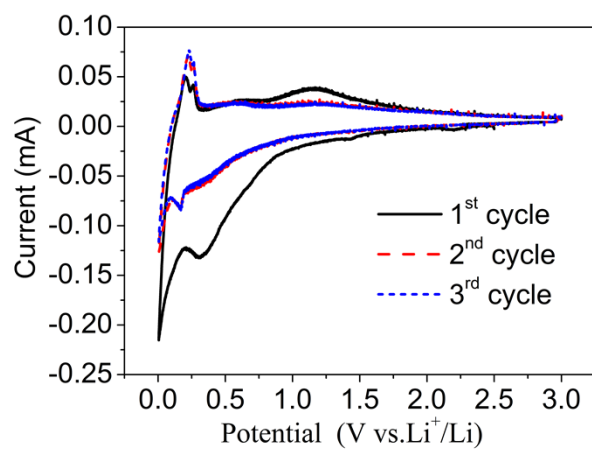

**Fig. S2** Cyclic voltammograms of the GNs electrode for the initial three cycles at a scan rate of  $0.1 \text{ mV s}^{-1}$  in the voltage range of 0.005-3.0 V.
